# Supplementary material
Source: Research Square preprint supplement (doi:10.21203/rs.3.rs-9255334/v1)
Supplement: Supplementary file 1 [file f5156ab4253fba40d11cd033.docx]

**Supplementary Information**

**Supplementary Methods**

Primary cohort: adult ICU stays with solid or hematologic malignancy flags. Malignancy type was retained as non-mutually exclusive binary indicators because 160 stays carried both solid and hematologic flags.

Primary exposure: ICU-onset atrial fibrillation surrogate. In the source extraction pipeline, prior AF was operationalized from diagnosis-based AF coding and AF during ICU stay was operationalized from time-stamped ICU rhythm-related records, with procedure records reviewed where applicable. ICU-onset AF surrogate was defined as AF during ICU stay without a prior AF flag. This variable should be interpreted as a structured surrogate rather than adjudicated incident AF.

Primary effect modifier: minimum platelet count within 48 hours categorized as >=150, 100-149, 50-99, and <50 x10^9/L.

Primary outcome: in-hospital death. Secondary outcomes: 28-day death, major bleeding identified by ICD coding, ischemic stroke identified by ICD coding, and supportive transfusion outcomes within 48 hours. Twenty-eight-day death was defined relative to ICU admission time.

Primary adjusted models included age, sex, solid malignancy, hematologic malignancy, metastatic disease, SOFA score, sepsis, vasopressor use, mechanical ventilation, CRRT, hemoglobin within 48 hours, creatinine within 48 hours, and any anticoagulation exposure within 48 hours. Any anticoagulation exposure included prophylactic and therapeutic regimens and was used as a broad adjustment variable rather than a direct marker of AF-directed therapy. INR, aPTT, lactate, and transfusion variables were summarized descriptively and were not part of the primary adjusted models.

**Supplementary notes**

ICD-based bleeding and ischemic stroke variables were used as coded surrogates. The current analytic export does not contain the underlying raw code list. These outcomes should therefore be interpreted as administrative surrogates rather than adjudicated clinical events.

The exploratory timing dataset was used only for descriptive analyses because its coverage did not fully match the primary new-onset AF surrogate cohort.

The analytic code and a study data dictionary will be deposited in a public GitHub repository and archived in Zenodo upon acceptance.

Supplementary Table 1 and Supplementary Table 2 are provided as separate editable files in CSV and XLSX format within the submission package.
